# Supplementary material for: Cell-Laden Marine Gelatin Methacryloyl Hydrogels Enriched with Ascorbic Acid for Corneal Stroma Regeneration
Source: MDPI journal article supplement (doi:10.3390/bioengineering10010062), 2023-01-04
Supplement: s1 [file s1]

## Supplementary material

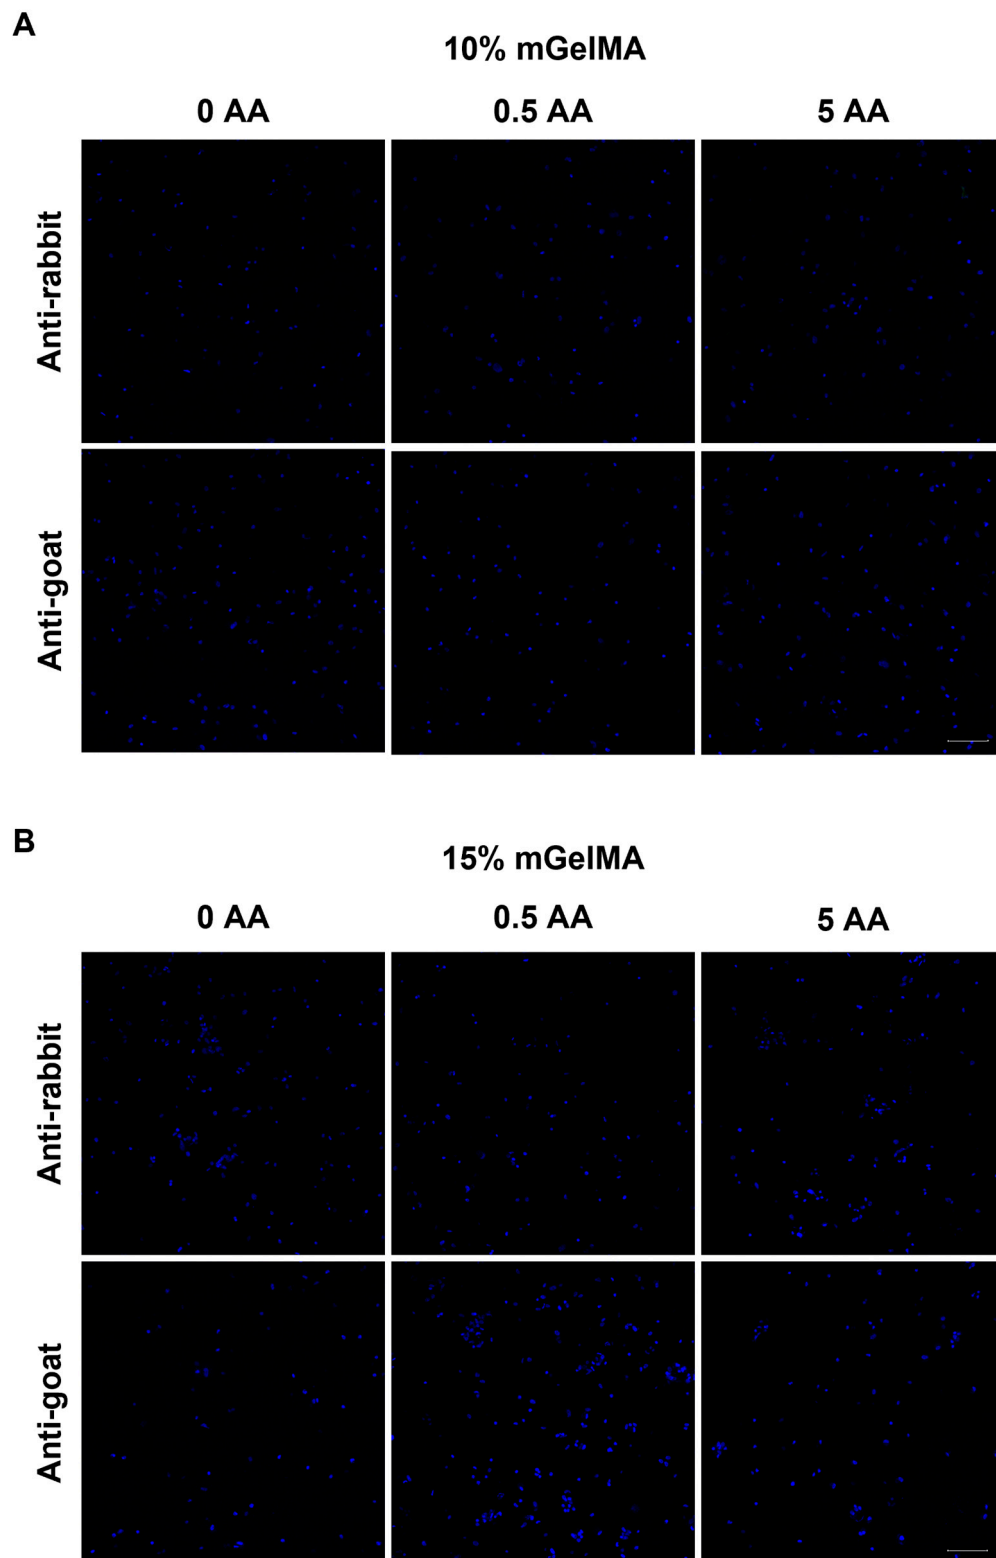

**Figure S1.** Immunofluorescence micrograph of control mGelMA hydrogels (10% mGelMA (A) and 15% mGelMA (B)) stained with anti-rabbit and anti-goat secondary antibodies only. Nuclei were stained with DAPI (blue). Scale bar are 100  $\mu$ m.
